# Supplementary material
Source: PubMed Central journal article supplement (PMC4788213)
Supplement: banp876722.ww1_default.pdf [file banp876722.ww1_default.pdf]

**Supplementary appendix for the Polish model** [posted as supplied by authors]

## **CONTENTS:**

|                                                                   |    |
|-------------------------------------------------------------------|----|
| 1. The Polish IMPACT model: introduction and detailed methodology | 3  |
| 2. Sources of data used in Polish IMPACT Model                    | 13 |
| 2. Result tables                                                  | 35 |

## **TABLES:**

|                                                                                                                                                                                                                           |           |
|---------------------------------------------------------------------------------------------------------------------------------------------------------------------------------------------------------------------------|-----------|
| <b>Table 1. Example of sensitivity analysis.</b>                                                                                                                                                                          | <b>12</b> |
| <b>Table 2. Main Data Sources for the Parameters Used in the Polish IMPACT Model</b>                                                                                                                                      | <b>13</b> |
| <b>Table 3. Clinical efficacy of interventions: relative risk reductions obtained from meta-analyses, and randomised controlled trials*</b>                                                                               | <b>16</b> |
| <b>Table 4. Data sources for treatment uptake levels in Poland 2005: Medical and surgical treatments included in the model</b>                                                                                            | <b>24</b> |
| <b>Table 5. Age-specific case fatality rates for each patient group</b>                                                                                                                                                   | <b>26</b> |
| <b>Table 6. Specific Beta Coefficients For Major Risk Factors: Data sources, values and comments.</b>                                                                                                                     | <b>27</b> |
| <b>Table 7. Relative Risks Used in the United States IMPACT Model for Smoking, Diabetes and Physical Inactivity for Coronary Heart Disease Mortality. (Best, Minimum and Maximum Estimates from the InterHeart Study)</b> | <b>29</b> |
| <b>Table 8. Polish IMPACT Model Risk Factor Methodology: Rationale for choice of regression or PARF approaches for specific risk factors</b>                                                                              | <b>30</b> |
| <b>Table 9. Main Assumptions and Overlap Adjustments Used in the Polish IMPACT Model</b>                                                                                                                                  | <b>34</b> |
| <b>Table 10. Estimated coronary heart disease deaths prevented or postponed by medical and surgical treatments in Poland in 2005</b>                                                                                      | <b>35</b> |
| <b>Table 11. Estimated coronary deaths prevented or postponed as a result of risk factor changes in men and women in Poland 1991 - 2005.</b>                                                                              | <b>38</b> |

# **1. The Polish IMPACT model: introduction and detailed methodology**

The tables included in this supplementary appendix document provide details about the methods that were used in creating the Polish IMPACT model. This model examines the effects of changes in treatments and risk factors trends on changes in mortality from coronary heart disease (CHD) among Polish adults aged 25-74 years. Earlier versions of the IMPACT mortality model have been previously applied to data from Europe, USA, New Zealand and China.<sup>1-7</sup> This cell-based mortality model, developed in Microsoft Excel, has been described in detail online and elsewhere<sup>3 4</sup>

## **Changes in mortality rates from CHD, Poland 1991-2005**

Data sources used in examining the changes in mortality rates from 1991 to 2005 among Polish adults aged 25-74 years are shown in Table 2. Mortality rates from CHD were calculated using the underlying cause of death: International Classification of Diseases (ICD)-9 codes 410-414 and ICD-10 codes I20-I25. Both unadjusted and age-adjusted mortality rates were calculated. Age-standardization was done using the direct method based on the Polish population in 2005.

Official statistical data on deaths due to the coronary heart disease in Poland in 1991–2005 are not consistent because of the changes in the coding system introduced after 1996. Between 1996 and 1999, the number of deaths due to CHD increased considerably, while the number of deaths due to atherosclerosis decreased. This is most probably a bias, because before 1996 many of CHD cases were coded as “Atherosclerosis”. This problem was fixed by developing method of estimation of real CHD trends. This method and entire problem were described in separate paper<sup>8</sup>

### ***Expected and observed number of deaths from CHD***

The data sources needed to estimate the expected and observed number of deaths from CHD for 2005 are shown in Table 2. The expected number of deaths from CHD in 2005 was calculated by multiplying the age-specific mortality rates from CHD in 1991 by the population counts for 2005 in that age-stratum. Summing over all age strata then yielded the *expected* numbers of deaths from CHD. The difference between the number of *expected* and *observed* number of deaths from CHD represents the mortality fall, the total number of *deaths prevented or postponed (DPPs)* from the combined changes in treatment patterns and risk factor prevalence.

## Treatments

The treatment arm of the Model includes the following populations of patients:

- those hospitalized with an acute myocardial infarction (AMI),
- patients admitted to the hospital with unstable angina,
- community-dwelling patients who have survived an AMI,
- patients who have undergone revascularisation procedure (coronary artery bypass grafting (CABG), or a percutaneous transluminal coronary angioplasty (PTCA), with or without stent.
- community-dwelling patients with angina pectoris (no revascularisation)
- patients admitted to hospital with heart failure,
- community-dwelling patients with heart failure (no hospital admission).
- Hypertensive individuals eligible for hypotensive therapy
- Hypercholesterolaemic subjects eligible for cholesterol lowering therapy

The main data sources used to estimate the numbers of these groups are shown in Table 2.

For each of the groups, we estimated the number of DPPs that were attributable to various treatments. A listing of the treatments that were considered in the model and the data sources used to estimate the percentages of patients receiving treatments are shown in Tables 3 and 4.

The general approach to calculating the number of DPPs from an intervention among a particular patient group was first to stratify by age and sex, then to multiply the estimated number of patients in the year 2005 by the proportion of these patients receiving a particular treatment, by the 1-year case-fatality rate, and by the relative reduction in the case-fatality rate due to the administered treatment. Sources for estimates of efficacy (relative risk reductions) are shown in Table 3. Sources for treatment uptakes are shown in Table 4.

Age-specific case-fatality rates for each patient group are presented in Table 5.

We assumed that compliance (concordance), the proportion of treated patients actually taking therapeutically effective levels of medication, was 100% among hospital patients, 70% among symptomatic community patients, and 50% among asymptomatic community patients<sup>9</sup>  
10 .

All these assumptions were tested in subsequent sensitivity analyses.

### **EXAMPLE 1: estimation of DPPs from a specific treatment**

For example, in Poland, in 2005, approximately 12 230 men aged 55-64 were hospitalized with acute myocardial infarction (AMI). The expected age-specific 1-year case-fatality rate without treatment for this group was approximately 5.4%. From registry data<sup>11</sup> 96% of them were given aspirin or other antiplatelet drug, interventions with an expected mortality reduction of 15%. the number of deaths prevented or postponed for at least a year by the use of aspirin among men aged 55 to 64 were then calculated as:

$$12\,230 \times 0.054 \times 0.96 \times 0.15 = 95$$

This calculation was then repeated

- a) for men and women in each age group, and
- b) incorporating a Mant and Hicks adjustment for multiple medications
- c) using maximum and minimum values for each parameter in each group, to generate a sensitivity analysis (see below).

## **Risk factors**

The second part of the IMPACT model involves estimating the number of coronary heart disease DPPs related to changes in cardiovascular risk factor levels in the population. The Polish IMPACT model includes smoking, total cholesterol, systolic blood pressure, body mass index, diabetes, and physical activity. Data sources used to calculate the trends in the prevalence (or mean values) of the specific risk factors are shown in Table 2.

Two approaches to calculating DPPs from changes in risk factors were used. In the **regression approach**—used for systolic blood pressure, total cholesterol, and body mass index--the number of deaths from CHD occurring in 1991 (the base year) were multiplied by the absolute change in risk factor prevalence, and by a regression coefficient quantifying the change in CHD mortality that would result from the change in risk factor level. Natural logarithms were used, as is conventional, in order to best describe the log-linear relationship between changes in risk factor levels and mortality.

### **EXAMPLE 2: estimation of DPPs from risk factor change using regression method:**

#### ***Mortality fall due to reduction in systolic blood pressure in women aged 55-64***

For example, in 1991, there were 2534 CHD deaths among women aged 55-64 years. Mean systolic blood pressure in this group decreased by 5.4 mmHg between 1991 and 2005. The meta-analysis reports an estimated age- and sex-specific reduction in mortality of 50 percent for every 20 mmHg reduction in systolic blood pressure, generating a logarithmic coefficient of  $-0.035^{12}$ . The number of deaths prevented or postponed was then estimated as:

$$\begin{aligned} & [\text{deaths in 1991}] * (1-\text{EXP}(\text{coefficient}*\text{change})) \\ & = 2534 (1-\text{EXP}(-0.035*5.4)) = 436 \end{aligned}$$

This calculation was then repeated

- a) for men and women in each age group, and
- b) using maximum and minimum values in each group, to generate a sensitivity analysis.

Data sources for the number of CHD deaths are shown in Table 2, sources for the population means of risk factors are shown in Table 2, and sources for the coefficients used in these analyses are listed in Table 6.

### **EXAMPLE 3: estimation of DPPs from risk factor change using PARF method**

The **population-attributable risk factor (PARF) approach** was used for smoking, diabetes, and physical activity. PARF was calculated conventionally as

$$(P \times (RR-1)) / (1+P \times (RR-1))$$

where P - prevalence of the risk factor and RR - the relative risk for CHD mortality associated with that risk factor. To assess the decline in CHD mortality the number of coronary heart disease deaths in 1991 (the base year) was multiplied by the difference between the population-attributable risk fraction in 1991 and that in 2005.

For example, the prevalence of diabetes among women aged 65-74 years was 8.7% in 1991 and 12.9% in 2005. Assuming a Relative Risk of 2.59<sup>13</sup>, the PARF was ~0.1215 in 1991 and ~0.1702 in 2005. Assuming the number of CHD deaths in 1991 = 7 180, The number of deaths attributable to the increase in diabetes prevalence from 1991 to 2005 was therefore

$$(7\ 180) * (0.170 - 0.122) = \sim 350 \text{ DPPs}$$

This calculation was then repeated

- a) for men and women in each age group,    b) for physical inactivity and smoking
- c) using maximum and minimum values in each group, to generate a sensitivity analysis



Data sources for the prevalence of risk factors and for the number of CHD deaths are shown in Table 2. Sources for the relative risks used in these PARF analyses are listed in Table 7. All come from the InterHeart study<sup>13</sup>, the largest international study to provide *independent* RR values, adjusted for other major risk factors.

The rationale for choosing the regression or PARF approaches for specific risk factors in the Polish IMPACT Model is detailed in Table 8.

## **OTHER METHODOLOGICAL CONSIDERATIONS**

Several methodological issues will be discussed below. These include adjusting the relative reduction in case-fatality rate for patients receiving multiple treatments, establishing rules for avoiding double-counting individual patients who may fall into more than a single disease category (patient group), treatment overlaps, and sensitivity analyses.

## **POLYPHARMACY ISSUES**

Individual CHD patients may take a number of different medications. However, data from randomized clinical trials on efficacy of treatment combinations are sparse. Mant and Hicks suggested a method to estimate case-fatality reduction by polypharmacy<sup>14</sup>. This approach was subsequently endorsed by Yusuf<sup>15</sup> and Law and Wald<sup>16</sup>.

**EXAMPLE 4: estimation of reduced benefit if patient taking multiple medications**

**(Mant and Hicks approach)**

If we take the example of **secondary prevention following acute myocardial infarction**, good evidence (Table 3) suggests that, for each intervention, the relative reduction in case fatality is approximately: aspirin 15%, beta-blockers 23%, ACE inhibitors 20%, statins 22% and rehabilitation 26%. The Mant and Hicks approach suggests that in individual patients receiving all these interventions, case-fatality reduction is very unlikely to be simply additive, i.e. not **106%** (15% + 23%+ 20% + 22% + 26%). Instead, having considered the 15% case fatality reduction achieved by aspirin, the next medication, in this case a beta-blocker, can only reduce the **residual** case fatality (1-15%). Likewise, the subsequent addition of an ACE inhibitor can then only decrease the **remaining** case fatality, which will be 1 - [(1- 0.15) X (1-0.23)].

The **Mant and Hicks approach** therefore suggests that a **cumulative relative benefit** can be estimated as follows:

Relative Benefit = 1 - [(1-relative reduction in case-fatality rate for treatment A) X (1- relative reduction in case-fatality rate for treatment B) X ...X (1- relative reduction in case-fatality rate for treatment N).

In considering appropriate treatments for AMI survivors, applying relative risk reductions (RRR) for aspirin, beta-blockers ACE inhibitors statins and rehabilitation then gives:

$$\begin{aligned}
\text{Relative Benefit} &= 1 - [(1 - \text{aspirin RRR}) \times (1 - \text{beta-blockers RRR}) \times (1 - \text{ACE inhibitors RRR}) \times (1 - \text{statins RRR}) \times (1 - \text{rehabilitation RRR})] \\
&= 1 - [(1 - 0.15) \times (1 - 0.23) \times (1 - 0.20) \times (1 - 0.22) \times (1 - 0.26)] \\
&= 1 - [(0.85) \times (0.77) \times (0.80) \times (0.78) \times (0.74)] \\
&= \mathbf{0.70 \text{ i.e. a 70\% lower case fatality}}
\end{aligned}$$

This represents a **34%** relative reduction (0.70/1.06) on the simple additive value of **106%**.

### **Potential overlaps between patient groups: avoiding double counting**

There are potential overlaps between CHD patient groups (Table 9). For example, approximately half the patients having CABG surgery have a previous AMI<sup>17</sup>, approximately 25% of AMI survivors develop heart failure within 12 months<sup>18</sup>, and over 50% of CHD patients have a history of hypertension<sup>19</sup>. All these assumptions were tested in subsequent sensitivity analyses.

### **SENSITIVITY ANALYSES**

Because of uncertainties surrounding many of the values, a multi-way sensitivity analysis was performed using the analysis of extremes method<sup>20</sup>. For each model parameter, a lower and upper value was assigned using either 95% confidence intervals where available (for instance therapeutic effectiveness quantified as a relative risk reduction in the relevant meta-analyses), or otherwise plus or minus 20%.

An analysis of extremes was therefore performed whereby the maximum and minimum feasible values were fed in to the model. By multiplying through, the resulting product then generated maximum and minimum estimates for deaths prevented or postponed (Table below).

### **EXAMPLE: sensitivity analysis for AMI patients given aspirin**

An example of calculating lower and upper-bound estimates for DPPs for treatment with aspirin among men aged 55-64 years who were hospitalized with an AMI is presented here. 95% confidence intervals from the meta-analysis were used for relative mortality reduction; lower and upper bound estimates for the other parameters were calculated as minus or plus 20% [except for treatment uptake that was capped at 99%]. Multiplying all the lower-bound estimates yielded the minimum [lower bound] estimate and multiplying the upper-bound estimates yielded the maximum [upper bound] estimate.

**Table 1. Example of sensitivity analysis.**

|                  | <b>Patient numbers</b> | <b>Treatment Uptake</b> | <b>Relative Mortality Reduction*</b> | <b>One year case fatality</b> | <b>Deaths prevented or postponed</b> |
|------------------|------------------------|-------------------------|--------------------------------------|-------------------------------|--------------------------------------|
|                  | <b>A</b>               | <b>B</b>                | <b>C</b>                             | <b>D</b>                      | <b>(A x B x C x D)</b>               |
| Best Estimate    | 12 226                 | 0.96                    | 15%                                  | 5.4%                          | 95                                   |
| Minimum estimate | 9 781                  | 0.77                    | 11%*                                 | 4.3%                          | 36                                   |
| Maximum estimate | 14671                  | 0.99                    | 19%*                                 | 6.5%                          | 179                                  |

\* 95% CI from the Antithrombotic Trialists' Collaboration meta-analysis<sup>21</sup>, see Table 3.

This approach may be described as a “robust” approach for two reasons.

a) maximum and minimum values for each variable were deliberately forced to provide a wider range rather than a narrower one, e.g. relative mortality reduction  $\pm 20\%$  rather than say,  $\pm 10\%$ .

b) the resulting product, for instance the minimum estimate, was generated by assuming that the lowest feasible values all occurred at the same time, a most unlikely situation.

## 2. Sources of data used in Polish IMPACT Model

**Table 2. Main Data Sources for the Parameters Used in the Polish IMPACT Model**

|                                                       | 1991                                  | 2005                          |
|-------------------------------------------------------|---------------------------------------|-------------------------------|
| Population statistics (number)                        | Central Statistical Office            | Central Statistical Office    |
| Deaths by age and sex (number)                        | NIPH<br>(ICD-9 codes 410-414)*        | NIPH<br>(ICD-10 codes I20-25) |
| <b>Number of patients admitted yearly</b>             |                                       |                               |
| Myocardial infarction: ICD9: 410<br>ICD 10: I21       | NIPH                                  | NIPH                          |
| Angina pectoris: ICD9: 413<br>ICD10: I20              | NIPH                                  | NIPH                          |
| Heart failure: ICD10: I50                             | NIPH                                  | NIPH                          |
| <b>Number of patients treated with</b>                |                                       |                               |
| CABG:                                                 | KROK                                  | KROK                          |
| PTCA:                                                 | Assume zero                           | PL-ACS                        |
| <b>Cardiopulmonary resuscitation in the community</b> |                                       |                               |
| Numbers & Uptake                                      |                                       |                               |
| Uptake                                                | Assume 1% of admitted<br>AMI patients | Rudner et al <sup>22</sup>    |
| <b>Acute myocardial infarction</b>                    |                                       |                               |
| Hospital Resuscitation                                | Assume 2% of admitted<br>AMI patients | PL-ACS, NIPH                  |
| Thrombolysis                                          | MONICA                                | PL-ACS, NIPH                  |
| Primary angioplasty                                   | Assume zero                           | PL-ACS, NIPH                  |
| Aspirin                                               | MONICA                                | PL-ACS, NIPH                  |
| Beta blockers                                         | MONICA                                | PL-ACS, NIPH                  |
| ACE inhibitors                                        | MONICA                                | PL-ACS, NIPH                  |
| Primary CABG surgery                                  | Assume zero                           | PL-ACS, NIPH                  |
| Primary PTCA (angioplasty)                            | Assume zero                           | PL-ACS, NIPH                  |
| <b>Angina pectoris: unstable</b>                      |                                       |                               |
| Prevalence                                            | Extrapolated                          | NIPH                          |
| Platelet IIB/IIIA Inhibitors                          | Assume zero                           | PL-ACS                        |
| Aspirin alone                                         | Expert opinion                        | PL-ACS                        |
| Aspirin & Heparin                                     | Expert opinion                        | PL-ACS                        |
| Primary CABG surgery                                  | Assume zero                           | PL-ACS, KROK                  |

|                                                    |                  |                              |
|----------------------------------------------------|------------------|------------------------------|
| Primary PTCA (angioplasty)                         | Assume zero      | PL-ACS                       |
| <b>Secondary prevention following AMI</b>          |                  |                              |
| Aspirin                                            | Pol-MONICA       | WOBASZ, SPOK                 |
| Beta blockers                                      | Pol-MONICA       | WOBASZ, SPOK                 |
| ACE inhibitors                                     | Assume zero      | WOBASZ, SPOK                 |
| Statins                                            | Assume zero      | WOBASZ, SPOK                 |
| Warfarin                                           | Assume zero      | WOBASZ                       |
| <b>Secondary prevention following CABG or PTCA</b> |                  |                              |
| Aspirin                                            | Assume zero      | WOBASZ                       |
| Beta blockers                                      | Assume zero      | WOBASZ                       |
| ACE inhibitors                                     | Assume zero      | WOBASZ                       |
| Statins                                            | Assume zero      | WOBASZ                       |
| Warfarin                                           | Assume zero      | WOBASZ                       |
| Rehabilitation                                     | Assume zero      | EUROASPIRE                   |
| <b>Congestive Heart Failure</b>                    |                  |                              |
| ACE inhibitors                                     | Assume zero      | HF2005                       |
| Beta blockers                                      | Assume zero      | HF2005                       |
| Spironolactone                                     | Assume zero      | HF2005                       |
| Aspirin                                            | Assume zero      | HF2005                       |
| Statins                                            | Assume zero      | HF2005                       |
| <b>Treatment for chronic angina</b>                |                  |                              |
| CABG surgery                                       | KROK             | NHDS                         |
| PTCA (angioplasty)                                 | Assume zero      | NHDS                         |
| <b>Community angina pectoris: total</b>            |                  |                              |
| Prevalence                                         |                  | WOBASZ                       |
| Aspirin                                            | Assume zero      | WOBASZ                       |
| Statins                                            | Assume zero      | WOBASZ                       |
| <b>Community Chronic heart failure</b>             |                  |                              |
| Prevalence                                         |                  | Expert opinion, Spanish data |
| ACE inhibitors                                     | Assume zero      | HF2005                       |
| Beta blockers                                      | Assume zero      | HF2005                       |
| Spironolactone                                     | Assume zero      | HF2005                       |
| Aspirin                                            | Assume zero      | HF2005                       |
| Statins                                            | Assume zero      | HF2005                       |
| <b>Hypertension</b>                                |                  |                              |
| Prevalence                                         | NATPOL II (1996) | WOBASZ                       |
| Treated (%)                                        | NATPOL II (1996) | WOBASZ                       |

**Statins etc for primary prevention**

|                          |             |        |
|--------------------------|-------------|--------|
| Hypercholesterolemia (%) | not needed  | WOBASZ |
| Treated (%)              | Assume zero | WOBASZ |

**POPULATION RISK FACTOR PREVALENCE**

|                         |                                    |                            |
|-------------------------|------------------------------------|----------------------------|
| Current smoking         | Central Statistical Office         | Central Statistical Office |
| Systolic blood pressure | NATPOL 1997 (extrapolated to 1991) | WOBASZ                     |
| Cholesterol             | MONICA                             | MONICA                     |
| Physical activity       | NATPOL 1997 (extrapolated to 1991) | WOBASZ                     |
| Obesity (BMI)           | NATPOL 1997 (extrapolated to 1991) | WOBASZ                     |
| Diabetes                | NATPOL 1997 (extrapolated to 1991) | WOBASZ                     |

**Key:**

ACE denotes angiotensin-converting enzyme, AMI acute myocardial infarction, CABG coronary artery bypass graft surgery, GUS – Central Statistical Office, HF2005 – Multicenter Study of Heart Failure Treatment in Poland (2005), ICD International Classification of Diseases, KROK – Cardiosurgery Registry, NATPOL – set of country representative cardiovascular risk factors surveys, NIPH – National Institute of Public Health, PL-ACS Polish Acute Coronary Syndromes Registry, PTCA percutaneous transluminal coronary angioplasty, SPOK – Study on quality of secondary prevention of myocardial infarction in Poland, WOBASZ – Multicenter Study on Health of Polish Citizens.

\*corrected for change in death registry system<sup>8</sup>,

**Table 3. Clinical efficacy of interventions: relative risk reductions obtained from meta-analyses, and randomised controlled trials\***

| <b>TREATMENTS</b>                  | <b>Relative Risk Reduction<br/>(95% CI)</b> | <b>Comments</b>                                                                                                                                                                               | <b>Source paper:<br/>First author (year), notes</b>             |
|------------------------------------|---------------------------------------------|-----------------------------------------------------------------------------------------------------------------------------------------------------------------------------------------------|-----------------------------------------------------------------|
| <b>Acute myocardial infarction</b> |                                             |                                                                                                                                                                                               |                                                                 |
| Thrombolysis                       | 31%<br>(95% CI: 14, 45)                     | <55 yrs: OR=0.692; RRR=30.8 (95% CI: 14-45)<br>55-64 yrs: OR=0.736; RRR=26.4 (95% CI: 17-40)<br>65-74 yrs: OR=0.752; RRR=24.8 (95% CI: 15-37)<br>>75 yrs: OR=0.844; RRR=15.6 (95% CI: 4-30)   | Estess(2002) <sup>23</sup> , [updated FTT]                      |
| Aspirin                            | 15%<br>(95% CI: 11, 19)                     | OR=0.85 (95% CI: 0.81, 0.89). RRR 15% (95% CI: 11,19)<br>page 75:outcome is vascular and nonvascular deaths                                                                                   | Antithrombotic<br>Trialists' Collaboration (2002) <sup>21</sup> |
| Primary angioplasty<br>STEMI       | 32%<br>(95% CI: 5, 50)                      | OR 0.68 (95% CI: 0.50, 0.95). RRR 32% (95% CI: 5,50)<br>outcome compares primary angioplasty to thrombolytics, not specific to STEMI, in results on page 3.                                   | Cucherat (2003) <sup>24</sup>                                   |
| Primary PTCA Non-<br>STEMI         | 32%<br>(95% CI: 5, 51)                      | OR 0.65 (95% CI: 0.49, 0.95). RRR 32% (95% CI: 5,51) for cardiovascular death on page 917. [RRR for cardiovascular death or MI was 26 (95% CI: 3,44) and was 24 (95% CI: 0,42) for any death] | RITA 3 (Fox 2005) <sup>25</sup>                                 |
| Primary CABG surgery               | 39%<br>(95% CI: 23, 52)                     | OR 0.61 (95% CI: 0.48, 0.77). RRR 39% (95% CI: 23,52) on page 565, 0-5 yr mortality                                                                                                           | Yusuf (1994) <sup>26</sup>                                      |



|                                             |                         |                                                                                                                                                                                                                                                                                                                                                                                                                                                                                                                                                                                                                                                                                                                                                                                                                                                                                                                                 |                                                                                        |
|---------------------------------------------|-------------------------|---------------------------------------------------------------------------------------------------------------------------------------------------------------------------------------------------------------------------------------------------------------------------------------------------------------------------------------------------------------------------------------------------------------------------------------------------------------------------------------------------------------------------------------------------------------------------------------------------------------------------------------------------------------------------------------------------------------------------------------------------------------------------------------------------------------------------------------------------------------------------------------------------------------------------------|----------------------------------------------------------------------------------------|
| Beta blockers                               | 4%<br>(95% CI: -8, 15)  | OR 0.96 (95% CI: 0.85, 1.08), RR 4% (95% CI: -8,15) on page 1732.                                                                                                                                                                                                                                                                                                                                                                                                                                                                                                                                                                                                                                                                                                                                                                                                                                                               | Freemantle (1999) <sup>27</sup>                                                        |
| ACE inhibitors                              | 7%<br>(95% CI: 2, 11)   | OR 0.93, (0.89, 0.98), RR 7% (2,11) for 30 day mortality in MI.                                                                                                                                                                                                                                                                                                                                                                                                                                                                                                                                                                                                                                                                                                                                                                                                                                                                 | ACE Inhibitor Myocardial Infarction Collaborative Group 1998 <sup>28</sup>             |
| <b>Cardio-pulmonary resuscitation (CPR)</b> |                         |                                                                                                                                                                                                                                                                                                                                                                                                                                                                                                                                                                                                                                                                                                                                                                                                                                                                                                                                 |                                                                                        |
| Community CPR                               | 5%<br>(95% CI: 4, 15.3) | Nichol study reports overall median survival to discharge at 7.4% in this multi-country/site review, page 520<br>The Model focuses on 30/7 survival. Discharge survival will therefore provide an over-estimate, which we have explicitly addressed by assuming 5% at 30/7.<br>Rea looks at odds of bystander dispatcher assisted CPR and bystander CPR without dispatch assistance and compares to No bystander CPR. 7265 out-of-hospital arrests attended. OR 0.59 - 0.69 for these two groups which would give RRRs of 41% and 31%. [Consider as crude equivalent of CPR to no CPR comparison]. 15.3% survival to discharge in King-county, WA; consider as maximum value. Use Nichol (1999) <sup>28</sup> 5% as average<br>Rudner reports 10% survival to discharge and 6% after 1 year in Katowice Poland. Assumed worse in whole Poland<br>Graham et al 1999 meta anlysis of papers 1973 - 1996 report 6.4% at discharge. | Nichol (1999) <sup>29</sup><br>Rea (2001) <sup>30</sup><br>Rudner (2004) <sup>22</sup> |
| Hospital CPR                                | 33%<br>(95% CI: 10, 36) | AMI accounted for 35% of adult total cases. Adult survival to discharge 36% post VF or VT (majority of post AMI cases, only 10.6% post Asystole,<br>Adult survival to discharge 18% overall, but this reflected                                                                                                                                                                                                                                                                                                                                                                                                                                                                                                                                                                                                                                                                                                                 | Nadkarni (2006) <sup>31</sup><br>Tunstall-Pedoe(1992) <sup>32</sup>                    |

|                                             |                         |                                                                                                                                                                                                                                                                                                                                                                                                                                                                                                                                                                                                                                                                                  |                                                                     |
|---------------------------------------------|-------------------------|----------------------------------------------------------------------------------------------------------------------------------------------------------------------------------------------------------------------------------------------------------------------------------------------------------------------------------------------------------------------------------------------------------------------------------------------------------------------------------------------------------------------------------------------------------------------------------------------------------------------------------------------------------------------------------|---------------------------------------------------------------------|
|                                             |                         | <p>ALL Medical arrests in hospital. (varied from 10-36% depending on type of initial rhythm) (tables 4 &amp; 5 page 55)</p> <p>Review of 36,000 adults with cardiac arrests in the 253 US/Canadian Hospitals National Registry of CPR. Nadkarni, JAMA, 2006:295 (1) 50-57)</p> <p>Older article from Tunstall-Pedoe on page 1350 shows survival at 24 hrs to be 32%, discharge to home at 21%, and 1 year survival to be 15% overall. (16% and 8% in general wards, 31% and 16% in coronary care unit (page 1349), etc. Assume in Poland in 2005 is better.</p> <p>Corroboration: Model assumes that approximately 2% AMI admissions have primary VF (Olmsted County study).</p> |                                                                     |
| <b>Secondary Prevention in CHD Patients</b> |                         |                                                                                                                                                                                                                                                                                                                                                                                                                                                                                                                                                                                                                                                                                  |                                                                     |
| Aspirin                                     | 15%<br>(95% CI: 11, 19) | OR 0.85 (95% CI: 0.49, 0.95), RR 15% (95% CI: 11, 19) outcome is vascular and nonvascular deaths on page 75. This data seems to be appropriate to this outcome in CHD patients                                                                                                                                                                                                                                                                                                                                                                                                                                                                                                   | Antithrombotic Trialists' Collaboration (2002) <sup>21</sup>        |
| Beta blockers                               | 23%<br>(95% CI: 15, 31) | OR 0.77 (95% CI: 0.85, 0.69), 23% (95% CI: 15,31) on page 1734. Odds of death in long term trials.                                                                                                                                                                                                                                                                                                                                                                                                                                                                                                                                                                               | Freemantle (1999) <sup>27</sup>                                     |
| ACE inhibitors                              | 20%<br>(95% CI: 13, 26) | OR 0.80 (95% CI: 0.74, 0.87), 20% (95% CI: 13,26) on page 1577, death up to 4 years [endpoint of study looking at those with heart failure or LV dysfunction.]                                                                                                                                                                                                                                                                                                                                                                                                                                                                                                                   | Flather (2000) <sup>33</sup>                                        |
| Statins                                     | 22%<br>(95% CI: 10, 26) | OR=0.78 (95% CI: 0.74—0.84). RRR=22% (95% CI: 10, 26)<br>RR=0.77 (95% CI: 0.68—0.87). RRR=23% (95% CI: 13,30)<br>in those with other CHD                                                                                                                                                                                                                                                                                                                                                                                                                                                                                                                                         | Cholesterol Treatment Trialists' Collaborators (2005) <sup>34</sup> |

|                              |                         |                                                                                                                                                                                                                                                                                                                                                                                                                                                                                                                    |                                                                                                        |
|------------------------------|-------------------------|--------------------------------------------------------------------------------------------------------------------------------------------------------------------------------------------------------------------------------------------------------------------------------------------------------------------------------------------------------------------------------------------------------------------------------------------------------------------------------------------------------------------|--------------------------------------------------------------------------------------------------------|
|                              |                         | OR=0.77 (95% CI: 0.71-0.83). RRR=23% (95% CI: 17, 29)<br>Wilt (2004) Section CHD mortality, page 1430.                                                                                                                                                                                                                                                                                                                                                                                                             | Wilt (2004) <sup>35</sup>                                                                              |
| Warfarin                     | 22%<br>(95% CI: 13, 31) | OR=0.78 (95% CI: 0.67-0.90), RRR=22% (95% CI: 10, 33)<br>Meta-analysis looking at oral anticoagulant therapy in coronary artery disease (31 trials about 18,000 patients) by intensity of INR control: High intensity (INR>2.8) warfarin vs. control for outcome of death had OR of 0.78(95% CI: 0.69-0.87) corresponding to a RRR of 22% (95% CI: 13, 31); Moderate intensity warfarin (INR 2-3.0) vs. control had OR of 0.82 (95% CI: 0.23-2.33) not significant but corresponding RRR of 18% (95% CI: -133, 77) | Anand and Yusuf (1999) <sup>36</sup><br>Lau (1992) <sup>37</sup> . Table 1, page 253 (anticoagulants). |
| <b><i>Chronic Angina</i></b> |                         |                                                                                                                                                                                                                                                                                                                                                                                                                                                                                                                    |                                                                                                        |
| CABG surgery years 0-5       | 39% (95% CI: 23, 52)    | OR= 0.61 (95% CI: 0.48-0.77), RR 39% (95% CI: 23,52) on page 565, 5 yr mortality                                                                                                                                                                                                                                                                                                                                                                                                                                   | Yusuf (1994) <sup>26</sup>                                                                             |
| CABG surgery years 6-10      | 32%<br>(95% CI: 2, 30)  | OR= 0.83 (95% CI: 0.70-0.98), RR 17 (95% CI: 2,30) on page 565, 10 yr mortality<br>OR= 0.68 (95% CI: 0.56-0.83), RR 32 (95% CI: 17,44) on page 565, 7 yr mortality<br>CABG compared to medical treatment                                                                                                                                                                                                                                                                                                           | Yusuf (1994) <sup>25</sup>                                                                             |

|                                              |                               |                                                                                                                                                                       |                                                                     |
|----------------------------------------------|-------------------------------|-----------------------------------------------------------------------------------------------------------------------------------------------------------------------|---------------------------------------------------------------------|
| Aspirin                                      | 15%<br>(95% CI: 11, 19)       | OR= 0.85 (95% CI: 0.81-0.89), RR 15% (95% CI: 11,19)<br>outcome is vascular and nonvascular deaths on page 75.                                                        | Antithrombotic<br>Trialists' Collaboration (2002) <sup>21</sup>     |
| Statins                                      | <b>22%</b><br>(95% CI: 10-26) | RR=0.78 (95% CI: 0.74—0.84). RRR=22% (95% CI: 10, 26)<br>RR=0.77 (95% CI: 0.68—0.87). RRR=23% (95% CI: 13,30)<br>in those with other CHD                              | Cholesterol Treatment Trialists' Collaborators (2005) <sup>33</sup> |
| <b><i>Unstable Angina</i></b>                |                               |                                                                                                                                                                       |                                                                     |
| Aspirin alone                                | 15%<br>(95% CI: 11, 19)       | OR= 0.85 (95% CI: 0.81-0.89), RR 15% (95% CI: 11,19)<br>outcome is vascular and nonvascular deaths on page 75.<br>Assume appropriate for unstable angina patients     | Antithrombotic<br>Trialists' Collaboration (2002) <sup>12</sup>     |
| Aspirin & Heparin                            | 33%<br>(95% CI: -2,56)        | OR 0.67 (95% CI: 0.48,1.02) RR 33% (95% CI: -2, 56) in<br>table 2. The study outcome is composite MI death and non<br>fatal MI, compares those on ASA+Hep to ASA only | Oler (1996) <sup>38</sup>                                           |
| Platelet glycoprotein<br>IIB/IIIA inhibitors | 9%<br>(95% CI: 2,16)          | RR 0.91 (95% CI: 0.84, 0.98) RR 9% (95% CI: 2,16) study<br>looked at acute coronary syndrome without persistent ST<br>elevation                                       | Boersma (2002) <sup>39</sup>                                        |
| Primary PTCA Non-<br>STEMI                   | 32%<br>(95% CI: 5-51)         | OR 0.68 (95% CI: 0.49, 0.95). RRR 32% (95% CI: 5, 51) for                                                                                                             | RITA 3 (Fox 2005) <sup>25</sup><br>Cardiovascular deaths, table 3   |
| Primary CABG<br>surgery                      | <b>43%</b><br>(95% CI: 19,60) | OR 0.57 (95% CI: 0.40, 0.81). RR 43% (95% CI: 19,60)<br>reduction in mortality at 5 years in those with class III/IV<br>angina, table 4, page 566.                    | Yusuf (1994) <sup>26</sup>                                          |

|                                                                   |                      |                                                                                                                                                                                                     |                                                                     |
|-------------------------------------------------------------------|----------------------|-----------------------------------------------------------------------------------------------------------------------------------------------------------------------------------------------------|---------------------------------------------------------------------|
| <b><i>Heart failure in patients requiring hospitalisation</i></b> |                      |                                                                                                                                                                                                     |                                                                     |
| ACE inhibitors                                                    | 20% (95% CI: 13,26)  | OR 0.80 (95% CI: 0.74, 0.87). RR 20% (95% CI: 13,26) on page 1577, [death up to 4 years was study endpoint for those with heart failure or LV dysfunction].                                         | Flather (2000) <sup>33</sup>                                        |
| Beta blockers                                                     | 35% (95% CI: 26,43)  | OR 0.65 (95% CI: 0.57, 0.74). RR 35% (95% CI: 26,43) : all cause mortality                                                                                                                          | Shibata (2001) <sup>40</sup>                                        |
| Spironolactone                                                    | 30% (95% CI: 18, 41) | OR 0.70 (95% CI: 0.59, 0.82). RR 30% (95% CI: 18,41) in those that had at least one cardiac related hospitalization. [ 31% (95% CI: 18-42) in entire study population of those with CHF, page 711 ] | Pitt (1999) <sup>41</sup>                                           |
| Aspirin                                                           | 15% (95% CI: 11,19)  | OR= 0.85 (95% CI: 0.81, 0.89), RR 15% (95% CI: 11,19) outcome is vascular and nonvascular deaths on page 75.                                                                                        | Antithrombotic Trialists' Collaboration (2002) <sup>21</sup>        |
| Statins                                                           | 22% (95% CI: 10-26%) | OR=0.78 (95% CI: 0.74, 0.84). RRR=22% (95% CI: 10-26), post AMI<br>OR=0.77 (95% CI: 0.68, 0.87). RRR=23% (95% CI: 13,30) in those with other CHD                                                    | Cholesterol Treatment Trialists' Collaborators (2005) <sup>34</sup> |
| <b><i>Heart failure in the community</i></b>                      |                      |                                                                                                                                                                                                     |                                                                     |
| ACE inhibitors                                                    | 20%                  | OR 0.80 (95% CI: 0.74, 0.87). RR 20% (95% CI: 13,26) on                                                                                                                                             | Flather (2000) <sup>33</sup>                                        |

|                                      |                      |                                                                                                                                                                                                           |                                                                     |
|--------------------------------------|----------------------|-----------------------------------------------------------------------------------------------------------------------------------------------------------------------------------------------------------|---------------------------------------------------------------------|
|                                      | (95% CI: 13,26)      | page 1577, death up to 4 years [in those with heart failure or LV dysfunction].                                                                                                                           |                                                                     |
| Beta blockers                        | 35% (95% CI: 26,43)  | OR 0.65 (95% CI: 0.57, 0.74). RR 35 (95% CI: 26,43).<br>Section 3.3 page 353                                                                                                                              | Shibata (2001) <sup>40</sup>                                        |
| Spirinolactone                       | 31% (95% CI: 18, 42) | OR 0.69 (95% CI: 0.58, 0.82). RR 31% (95% CI: 18-42) in entire study population consisting of those with CHF, page 711 [30 (95% CI: 18, 41) in those with a cardiac related hospitalization].             | Pitt (1999) <sup>41</sup>                                           |
| Aspirin                              | 15% (95% CI: 11, 19) | OR= 0.85 (0.81, 0.89), RR 15% (11,19) outcome is vascular and nonvascular deaths on page 75. Assume appropriate for patients with CHF due to CHD                                                          | Antithrombotic Trialists' Collaboration (2002) <sup>21</sup>        |
| Statins                              | 22% (95% CI: 10-26%) | OR=0.78 (95% CI: 0.74, 0.84). RRR=22% (95% CI: 10-26)<br>OR=0.77 (95% CI: 0.68, 0.87). RRR=23% (95% CI: 13,30) in those with other CHD                                                                    | Cholesterol Treatment Trialists' Collaborators (2005) <sup>34</sup> |
| <b><i>Hypertension treatment</i></b> |                      |                                                                                                                                                                                                           |                                                                     |
|                                      | 13% (95% CI: 6,19)   | OR 0.87 (95% CI: 0.81, 0.94). RRR 13% (95% CI: 6, 19) in those with high blood pressure without disease at entry. [RRR 29% (95% CI: 17, 37) those with average blood pressure and CHD, treated with ACEI] | Law (2003) <sup>42</sup>                                            |
|                                      |                      |                                                                                                                                                                                                           |                                                                     |

| <i>Therapies for primary prevention of raised cholesterol</i> |                         |                                                                                                                     |                              |
|---------------------------------------------------------------|-------------------------|---------------------------------------------------------------------------------------------------------------------|------------------------------|
| Statins                                                       | 35%<br>(95% CI: 11, 52) | OR 0.65 (95% CI: 0.48, 0.89). 35% (95% CI: 11,52) for CHD mortality (only trials using statins), figure 3 on page 4 | Pignone (2000) <sup>43</sup> |
| Gemfibrozil                                                   | 7%<br>(95% CI: -8, 19)  | OR 0.93 (95% CI: 0.81, 1.08); RRR 7% (95% CI: -8, 19)                                                               | Studer (2005) <sup>49</sup>  |
| Niacin                                                        | 5%<br>(95% CI: -10, 18) | OR 0.95 (95% CI: 0.82, 1.10); RRR 5% (95% CI: -10, 0.18)                                                            | Studer (2005) <sup>49</sup>  |

\* Relative Risk Reduction calculated as 1- Odds Ratio

\*\* Gemfibrozil and Niacin are not widely used in Poland thus removed from model.

**Table 4. Data sources for treatment uptake levels in Poland 2005: Medical and surgical treatments included in the model**

| <b>TREATMENTS</b>                                   | <b>Treatment Uptake in 2005 (weighted averages for all age strata<sup>#</sup>); data for 1991 in parentheses</b> | <b>Source (year)</b>                                                                    |
|-----------------------------------------------------|------------------------------------------------------------------------------------------------------------------|-----------------------------------------------------------------------------------------|
| <b>ACUTE MYOCARDIAL INFARCTION</b>                  |                                                                                                                  |                                                                                         |
| Thrombolysis                                        | 4,3% (10%)                                                                                                       | National Registry of Acute Coronary Syndromes (2005)<br>Pol-MONICA (1991) <sup>44</sup> |
| Antiplatelet                                        | 81% (65%)                                                                                                        |                                                                                         |
| Primary angioplasty                                 | 39% (0%)                                                                                                         |                                                                                         |
| Primary CABG                                        | 1% (0%)                                                                                                          |                                                                                         |
| Beta blockers                                       | 64% (38%)                                                                                                        |                                                                                         |
| ACE inhibitors                                      | 62%(13%)                                                                                                         |                                                                                         |
| <b>Cardio-pulmonary resuscitation</b>               |                                                                                                                  |                                                                                         |
| In the Community                                    | 16%                                                                                                              | Rudner (2004) <sup>22</sup>                                                             |
| In Hospital                                         | 2%*                                                                                                              | Bunch (2003) <sup>45</sup>                                                              |
| <b>SECONDARY PREVENTION (POST-AMI)</b>              |                                                                                                                  |                                                                                         |
| Aspirin                                             | 56% (55%)                                                                                                        | WOBASZ (2003-2005)<br>Pol-MONICA (1991)                                                 |
| Beta blockers                                       | 48% (30%)                                                                                                        | WOBASZ (2003-2005)<br>Pol-MONICA (1991)                                                 |
| ACE inhibitors                                      | 49% (0%)                                                                                                         | WOBASZ (2003-2005)                                                                      |
| Statins                                             | 35% (0%)                                                                                                         | WOBASZ (2003-2005)                                                                      |
| Warfarin                                            | 3% (0%)                                                                                                          | WOBASZ (2003-2005)                                                                      |
| <b>SECONDARY PREVENTION (POST-REVASCLARISATION)</b> |                                                                                                                  |                                                                                         |
| Aspirin                                             | 84% (0%)                                                                                                         | WOBASZ (2003-2005)                                                                      |
| Beta blockers                                       | 67% (0%)                                                                                                         | WOBASZ (2003-2005)                                                                      |
| ACE inhibitors                                      | 65% (0%)                                                                                                         | WOBASZ (2003-2005)                                                                      |
| Statins                                             | 66% (0%)                                                                                                         | WOBASZ (2003-2005)                                                                      |
| Warfarin                                            | 7% (0%)                                                                                                          | WOBASZ (2003-2005)                                                                      |
| <b>CHRONIC ANGINA</b>                               |                                                                                                                  |                                                                                         |
| CABG surgery                                        | 11% (0%)                                                                                                         | National Registry of Cardiosurgery (2005)                                               |
| Aspirin in community                                | 43% (?%)                                                                                                         | WOBASZ (2003-2005)                                                                      |
| Statins in community                                | 21% (0%)                                                                                                         | WOBASZ (2003-2005)                                                                      |



|                                                     |           |                                       |
|-----------------------------------------------------|-----------|---------------------------------------|
| <b>UNSTABLE ANGINA</b>                              |           |                                       |
| Aspirin & Heparin                                   | 58% (10%) | PL-ACS (2005)                         |
| Aspirin alone                                       | 26% (30%) | PL-ACS (2005)                         |
| Platelet glycoprotein IIB/IIIA inhibitors           | 1% (0%)   | PL-ACS (2005)                         |
| CABG surgery for UA                                 | 1% (0%)   | PL-ACS (2005)                         |
| Angioplasty for UA                                  | 14% (0%)  | PL-ACS (2005)                         |
| <b>Heart Failure including a hospital admission</b> |           |                                       |
| ACE inhibitors                                      | 86% (0%)  | HF2005                                |
| Beta blockers                                       | 61% (0%)  |                                       |
| Spirolactone                                        | 64% (0%)  |                                       |
| Aspirin                                             | 65% (0%)  |                                       |
| Statins                                             | 41% (0%)  |                                       |
| <b>Heart Failure in the community</b>               |           |                                       |
| ACE inhibitors                                      | 49% (0%)  | HF2005                                |
| Beta blockers                                       | 46% (0%)  |                                       |
| Spirolactone                                        | 27% (0%)  |                                       |
| Aspirin                                             | 37% (0%)  |                                       |
| Statins                                             | 31% (0%)  |                                       |
| <b>HYPERTENSION TREATMENTS</b>                      | 45% (32%) | WOBASZ (2003-2005)<br>NATPOL (1991)** |
| <b>HYPERLIPIDAEMIA - 1' PREVENTION</b>              |           |                                       |
| Statins                                             | 11% (0%)  | WOBASZ (2003-2005)                    |

# Uptake percentages as reported in source papers. Values may differ from those in Table 1 of manuscript, which report weighted averages for ALL age groups 25-84 years included in the Model.

\* Assume approximately 2% of AMI admissions have primary ventricular fibrillation (Olmsted county)<sup>51</sup>.

\*\* Extrapolated from 1997-2002 data.

**Table 5. Age-specific case fatality rates for each patient group**

\*excluding heart failure patients (already considered within heart failure groups)

| <b>GROUP</b>    | <b>AMI</b>    | <b>Post AMI</b>  | <b>Unstable Angina</b> | <b>CABG surgery</b> | <b>Angioplasty</b> | <b>Heart Failure Hospital</b> | <b>Heart Failure Community</b> | <b>Hypertension</b> | <b>Hypercholesterolemia</b> |
|-----------------|---------------|------------------|------------------------|---------------------|--------------------|-------------------------------|--------------------------------|---------------------|-----------------------------|
| <i>Interval</i> | <b>30 day</b> | <b>One year*</b> | <b>One year*</b>       | <b>One year*</b>    | <b>One year*</b>   | <b>One year</b>               | <b>One year</b>                | <b>One year</b>     | <b>One year</b>             |
| <b>Mean</b>     | 0.084         | 0.051            | 0.069                  | 0.020               | 0.016              | 0.246                         | 0.081                          | 0.010               | 0.006                       |
| <b>MEN</b>      |               |                  |                        |                     |                    |                               |                                |                     |                             |
| <b>25-34</b>    | 0.011         | 0.008            | 0.016                  | 0.003               | 0.003              | 0.034                         | 0.011                          | 0.000               | 0.000                       |
| <b>35-44</b>    | 0.012         | 0.009            | 0.024                  | 0.005               | 0.005              | 0.068                         | 0.022                          | 0.001               | 0.001                       |
| <b>45-54</b>    | 0.023         | 0.017            | 0.034                  | 0.007               | 0.007              | 0.096                         | 0.032                          | 0.002               | 0.002                       |
| <b>55-64</b>    | 0.054         | 0.034            | 0.056                  | 0.012               | 0.012              | 0.140                         | 0.045                          | 0.006               | 0.006                       |
| <b>65-74</b>    | 0.101         | 0.073            | 0.070                  | 0.023               | 0.025              | 0.283                         | 0.093                          | 0.014               | 0.014                       |
| <b>75-84</b>    | 0.164         | 0.122            | 0.091                  | 0.042               | 0.042              | 0.337                         | 0.111                          | 0.035               | 0.035                       |
| <b>85+</b>      | 0.279         | 0.189            | 0.118                  | 0.075               | 0.074              | 0.418                         | 0.138                          | 0.094               | 0.094                       |
| <b>WOMEN</b>    |               |                  |                        |                     |                    |                               |                                |                     |                             |
| <b>25-34</b>    | 0.011         | 0.004            | 0.016                  | 0.003               | 0.003              | 0.034                         | 0.011                          | 0.000               | 0.000                       |
| <b>35-44</b>    | 0.013         | 0.006            | 0.024                  | 0.005               | 0.005              | 0.068                         | 0.022                          | 0.001               | 0.001                       |
| <b>45-54</b>    | 0.026         | 0.010            | 0.034                  | 0.007               | 0.007              | 0.096                         | 0.032                          | 0.001               | 0.001                       |
| <b>55-64</b>    | 0.061         | 0.019            | 0.056                  | 0.012               | 0.012              | 0.140                         | 0.045                          | 0.002               | 0.002                       |
| <b>65-74</b>    | 0.114         | 0.084            | 0.070                  | 0.023               | 0.027              | 0.222                         | 0.081                          | 0.007               | 0.007                       |
| <b>75-84</b>    | 0.167         | 0.116            | 0.091                  | 0.042               | 0.039              | 0.289                         | 0.094                          | 0.021               | 0.021                       |
| <b>85+</b>      | 0.267         | 0.177            | 0.118                  | 0.075               | 0.061              | 0.368                         | 0.121                          | 0.079               | 0.079                       |

**SOURCE** US Medicare US Medicare Van Domberg<sup>46</sup> US Medicare US Medicare US Medicare US Medicare NHANES & Vital Statistics

**Table 6. Specific Beta Coefficients For Major Risk Factors: Data sources, values and comments.**

**Estimated  $\beta$  coefficients from multiple regression analyses for the relationship between absolute changes in population mean risk factors and % changes in coronary heart disease mortality for men and women, stratified by age.**

|                                            | Age groups (years) |               |               |               |               |
|--------------------------------------------|--------------------|---------------|---------------|---------------|---------------|
| <b>SYSTOLIC Blood Pressure</b>             |                    |               |               |               |               |
|                                            | 25-44              | 45-54         | 55-64         | 65-74         | 75-84         |
| <b>Men</b> (hazard ratio per 20 mmHg)      | <b>0.49</b>        | <b>0.49</b>   | <b>0.52</b>   | <b>0.58</b>   | <b>0.65</b>   |
| <b>Men</b> (log hazard ratio per 1 mmHg)   | <b>-0.036</b>      | <b>-0.035</b> | <b>-0.032</b> | <b>-0.027</b> | <b>-0.021</b> |
| Min                                        | -0.029             | -0.028        | -0.026        | -0.022        | -0.017        |
| Max                                        | -0.043             | -0.042        | -0.039        | -0.032        | -0.025        |
| <b>Women</b> (hazard ratio per 20 mmHg)    | <b>0.40</b>        | <b>0.40</b>   | <b>0.49</b>   | <b>0.52</b>   | <b>0.59</b>   |
| <b>Women</b> (log hazard ratio per 1 mmHg) | <b>-0.046</b>      | <b>-0.046</b> | <b>-0.035</b> | <b>-0.032</b> | <b>-0.026</b> |
| Min                                        | -0.037             | -0.037        | -0.028        | -0.026        | -0.021        |
| Max                                        | -0.055             | -0.055        | -0.042        | -0.039        | -0.031        |

Source: Prospective studies collaborative meta-analysis, Lancet 2002<sup>12</sup>

\*UNITS: % mortality change per 20 mmHg change in Systolic BP

Strengths: massive dataset, adjusted for regression dilution bias, consistent with randomized clinical trials, results stratified by sex and age, with 95% CIs

Limitations: some publication bias still possible.

| CHOLESTEROL                                    | Age groups (years) |                |                |                |                |                |
|------------------------------------------------|--------------------|----------------|----------------|----------------|----------------|----------------|
|                                                | 25-44              | 45-54          | 55-64          | 65-74          | 75-84          | 85+            |
| Men & Women (Mortality reduction per 1 mmol/l) | <b>0.900</b>       | <b>0.650</b>   | <b>0.450</b>   | <b>0.333</b>   | <b>0.317</b>   | <b>0.250</b>   |
| <b>Log coefficient</b>                         | <b>-1.2942</b>     | <b>-0.8238</b> | <b>-0.5245</b> | <b>-0.3719</b> | <b>-0.3512</b> | <b>-0.2709</b> |
| Lower 95% CI                                   | -1.035             | -0.659         | -0.420         | -0.298         | -0.281         | -0.217         |
| Upper 95% CI                                   | -1.553             | -0.989         | -0.629         | -0.446         | -0.421         | -0.325         |

Source: Law & Wald meta-analysis<sup>47</sup>

\*UNITS: % mortality change per 1 mmol/l (38.6 mg/dl) change in total cholesterol

Strengths: adjusted for regression dilution bias, includes randomized clinical trials, RCT values consistent with observational data, results stratified by sex and age, with 95% CIs

Limitations: some publication bias still possible.

| BODY MASS INDEX (BMI)                                                                         | Age groups (years) |               |               |               |               |
|-----------------------------------------------------------------------------------------------|--------------------|---------------|---------------|---------------|---------------|
|                                                                                               | <44                | 45-59         | 60-69         | 70-79         | 80+           |
| Risk reduction per 1 kg/m <sup>2</sup> : James Asia Pacific data                              | 0.1100             | 0.0900        | 0.0500        | 0.0400        | 0.0300        |
| Asia Pacific age gradient therefore:                                                          | 1.22               | <b>1.00</b>   | 0.56          | 0.44          | 0.33          |
| Bogers relative risks, CHD deaths per 5 kg/m <sup>2</sup>                                     |                    | <b>1.16</b>   |               |               |               |
| Age specific relative risks per 1 kg/m <sup>2</sup> , applying age gradients from James et al | 1.04               | <b>1.03</b>   | 1.02          | 1.01          | 1.01          |
| <b>Men &amp; Women, log coefficients*</b>                                                     | <b>0.0363</b>      | <b>0.0297</b> | <b>0.0165</b> | <b>0.0132</b> | <b>0.0099</b> |
| Minimum values                                                                                | 0.0255             | 0.0209        | 0.0116        | 0.0093        | 0.0070        |
| Maximum values ( <i>from James et al</i> )                                                    | 0.0466             | 0.0381        | 0.0212        | 0.0169        | 0.0127        |

Source: Bogers et al.,<sup>48</sup> James et al. 2004<sup>49</sup>

\*UNITS: % mortality change per 1 kg/m<sup>2</sup> change in BMI

Strengths: Large number of studies included. Adjusted for blood pressure, total cholesterol, and physical activity. 95% CIs also provided.

Limitations: Observational data; age gradient applied from James study.

**Table 7. Relative Risks Used in the United States IMPACT Model for Smoking, Diabetes and Physical Inactivity for Coronary Heart Disease Mortality. (Best, Minimum and Maximum Estimates from the InterHeart Study)**

(and see Introduction for a worked example)

**Yusuf InterHEART Study. Lancet 2004.<sup>13</sup> Odds ratios for relative effect of risk factors (99% Confidence Intervals, NOT 95%)**

|                              | Both sexes              |                         | Men                      |                         | Women                   |                         |
|------------------------------|-------------------------|-------------------------|--------------------------|-------------------------|-------------------------|-------------------------|
|                              | Young                   | Old                     | ≤55 years                | >55 years               | ≤65 years               | > 65 years              |
| <b>Lifestyle factors</b>     |                         |                         |                          |                         |                         |                         |
| <b>Smoking</b>               | <b>3.33 (2.86-3.87)</b> | <b>2.44 (2.10-2.84)</b> | <b>3.33 (2.80-3.95)</b>  | <b>2.52 (2.15-2.96)</b> | <b>4.49 (3.11-6.47)</b> | <b>2.14 (1.35-3.39)</b> |
| <b>Fruit and vegetables</b>  | 0.69 (0.58-0.81)        | 0.72 (0.61-0.85)        | 0.72 (0.59-0.88)         | 0.77 (0.64-0.93)        | 0.62 (0.44-0.87)        | 0.55 (0.38-0.80)        |
| <b>Exercise</b>              | <b>0.95 (0.79-1.14)</b> | <b>0.79 (0.66-0.94)</b> | <b>1.02 (0.83-1.25)*</b> | <b>0.79 (0.66-0.96)</b> | <b>0.74 (0.49-1.10)</b> | <b>0.75 (0.46-1.22)</b> |
| <b>Alcohol</b>               | 1.00 (0.85-1.17)        | 0.85 (0.73-1.00)        | 1.03 (0.87-1.23)         | 0.86 (0.73-1.01)        | 0.74 (0.41-1.31)        | 0.83 (0.49-1.42)        |
| <b>Hypertension</b>          | 2.24 (1.93-2.60)        | 1.72 (1.52-1.95)        | 1.99 (1.66-2.39)         | 1.72 (1.49-1.98)        | 2.94 (2.25-3.85)        | 1.82 (1.39-2.38)        |
| <b>Diabetes</b>              | <b>2.96 (2.40-3.64)</b> | <b>2.05 (1.71-2.45)</b> | <b>2.66 (2.04-3.46)</b>  | <b>1.93 (1.58-2.37)</b> | <b>3.53 (2.49-5.01)</b> | <b>2.59 (1.78-3.78)</b> |
| <b>Abdominal obesity</b>     | 1.79 (1.52-2.09)        | 1.50 (1.29-1.74)        | 1.83 (1.52-2.20)         | 1.54 (1.30-1.83)        | 1.58 (1.14-2.20)        | 1.22 (0.88-1.70)        |
| <b>Psychosocial</b>          | 2.87 (2.19-3.77)        | 2.43 (1.86-3.18)        | 2.62 (1.91-3.60)         | 2.45 (1.82-3.29)        | 3.92 (2.26-6.79)        | 2.31 (1.22-4.39)        |
| <b>High ApoB/ApoA1 ratio</b> | 4.35 (3.49-5.42)        | 2.50* (2.05-3.05)       | 4.16 (3.19-5.42)         | 2.51 (2.00-3.15)        | 4.83 (3.19-7.32)        | 2.48 (1.60-3.83)        |

Smoking, adverse lipid profile, hypertension, and diabetes had a greater relative effect on risk of acute myocardial infarction in younger than older individuals

\*The INTERHEART study quoted a value of only 1.02 for exercise in men aged <55 years. This was clearly an outlier. We have therefore assumed a value of 0.77 in line with men and women in the other age groups, and consistent with most other studies<sup>50</sup>.

**Table 8. Polish IMPACT Model Risk Factor Methodology: Rationale for choice of regression or PARF approaches for specific risk factors**

Modelling TREATMENT effects appears reasonably precise, because each treatment has a meta-analysis with a fairly well quantified efficacy value, plus 95% confidence intervals. Quantifying the mortality reduction attributable to the change in a specific RISK FACTOR remains a less precise science. This table explains the rationale for choosing the best approach for each risk factor: regression based on absolute change in the risk factor\*, regression based on relative change in the risk factor\*, or population attributable risk fraction (PARF).

We also specify the best data source for each.

\*Absolute and Relative beta regression approaches are illustrated earlier in the Supplementary Appendix.

An ABSOLUTE beta regression coefficient quantifies the CHD mortality reduction for each UNIT change in risk factor, e.g. mmHg change for BP, or mg/dl change for cholesterol

A RELATIVE beta regression coefficient quantifies the CHD mortality reduction for each % relative change in risk factor, e.g. a 12 mmHg fall in SBP, from 120 mmHg to 108 mmHg, would represent a **10%** relative decrease (12/120).

| <b>Risk Factor</b>                                      | <b>Source</b>          | <b>Strengths</b>                                                                                                  | <b>Limitations</b>                                                                           | <b>Comments and recommendation</b>                | <b>DPP value in Polish Model (contribution to total CHD mortality fall)</b> |
|---------------------------------------------------------|------------------------|-------------------------------------------------------------------------------------------------------------------|----------------------------------------------------------------------------------------------|---------------------------------------------------|-----------------------------------------------------------------------------|
| <b>BLOOD PRESSURE</b>                                   |                        |                                                                                                                   |                                                                                              |                                                   |                                                                             |
| 1. Systolic BP: regression using absolute beta approach | PSC 2002 <sup>12</sup> | Large meta-analyses. Age and sex stratified. SBP preferable to DBP, because stronger relationship with CHD deaths | Observational data- assume complete reversibly of risk                                       | CURRENT APPROACH<br>Supersedes relative approach. | 68,880 (20%)                                                                |
| 2. Diastolic BP. Regression using absolute beta         | Law 2003 <sup>42</sup> | Appeared adequate in England and Whales model log linear.                                                         | SBP superior to DBP as a risk factor for CHD.                                                | Superseded                                        | 310,880 (91%)                                                               |
| 3. PARF                                                 | Midspan                | Original approach in Scottish IMPACT Model                                                                        | Sensitive to reference value and category cut-offs. Estimated DPPs always appeared very low. | Obsolete                                          | -                                                                           |

| <b>CHOLESTEROL</b>                 |                                        |                                                                                                                                                                                                     |                                                                                                                                                |                                                                               |                 |
|------------------------------------|----------------------------------------|-----------------------------------------------------------------------------------------------------------------------------------------------------------------------------------------------------|------------------------------------------------------------------------------------------------------------------------------------------------|-------------------------------------------------------------------------------|-----------------|
| 1. Regression using absolute Beta  | Law et al, meta-analysis <sup>51</sup> | Large meta-analysis, split by age and sex; cohort and RCT results very consistent; supported by more recent reviews                                                                                 | Published in 1994                                                                                                                              | CURRENT APPROACH                                                              | 82,830 (24%)    |
| 2. Regression using relative Beta* | Vartiainen 1994 <sup>52</sup>          | Appeared satisfactory in earlier IMPACT Models; similar to log-linear approach.                                                                                                                     | Not log-linear                                                                                                                                 | Superseded                                                                    | 101,915 (30%)   |
| 3. PARF using quintiles            | Midspan                                | Used in 1996                                                                                                                                                                                        | Sensitive to reference value and category cut-offs                                                                                             | Obsolete since 1997                                                           | -               |
|                                    |                                        |                                                                                                                                                                                                     |                                                                                                                                                |                                                                               |                 |
| <b>BMI</b>                         |                                        |                                                                                                                                                                                                     |                                                                                                                                                |                                                                               |                 |
| 1. Regression using absolute Beta  | Bogers et al 2006 <sup>48</sup>        | Large meta-analysis, Broadly consistent with Asian and PSC analyses; age-splits taken from James et al. Adjusted for major confounders: smoking, cholesterol, blood pressure, and physical activity | An “upstream” CHD risk factor. CHD risk partly or wholly mediated through “downstream factors: BP, cholesterol and impaired glucose tolerance. | CURRENT APPROACH Potential confounding addressed by using this adjusted value | -25,905 (-7.6%) |
| 2. Regression using relative Beta  | Never required                         |                                                                                                                                                                                                     |                                                                                                                                                |                                                                               |                 |
|                                    |                                        |                                                                                                                                                                                                     |                                                                                                                                                |                                                                               |                 |
| 3. PARF using OBESITY quintiles    | Inter Heart <sup>53</sup>              | Large, global study                                                                                                                                                                                 | Sensitive to reference value and category cut-offs. Under-estimation likely.                                                                   | An arbitrary approach to a continuous variable. Superseded                    | -39,840 (-12%)  |

| <b>SMOKING</b>                    |                               |                                                                                                                        |                                                                |                  |              |
|-----------------------------------|-------------------------------|------------------------------------------------------------------------------------------------------------------------|----------------------------------------------------------------|------------------|--------------|
| 1. PARF                           | Inter Heart <sup>13</sup>     | Log linear. InterHeart large, global study. RRs consistent with other studies. Appropriate for a dichotomous variable. | Regression approach might provide useful alternative approach? | CURRENT APPROACH | 39,925 (12%) |
| 2. Regression using absolute beta | Vartiainen 1994 <sup>52</sup> | Used in earlier IMPACT Models. Result consistent with PARF approach.                                                   | Not dichotomous. Not log-linear                                | Superseded       | 47,380 (14%) |



|                        |                           |                                                                                                      |                                                                |                  |                |
|------------------------|---------------------------|------------------------------------------------------------------------------------------------------|----------------------------------------------------------------|------------------|----------------|
| <b>DIABETES</b>        |                           |                                                                                                      |                                                                |                  |                |
| 1. PARF approach       | Inter Heart <sup>13</sup> | Large, global study. RRs consistent with other studies. Appropriate method for dichotomous variable. | Case control study, albeit huge.                               | CURRENT APPROACH | -33,465 (-10%) |
| 2. Regression approach | -                         | -                                                                                                    | Appropriate Betas not identified, and methodologically dubious | Not attempted    | -              |
|                        |                           |                                                                                                      |                                                                |                  |                |

|                          |                           |                                                                                                      |                                                                                                                                       |                  |             |
|--------------------------|---------------------------|------------------------------------------------------------------------------------------------------|---------------------------------------------------------------------------------------------------------------------------------------|------------------|-------------|
|                          |                           |                                                                                                      |                                                                                                                                       |                  |             |
| <b>PHYSICAL ACTIVITY</b> |                           |                                                                                                      |                                                                                                                                       |                  |             |
| 1. PARF approach         | Inter Heart <sup>13</sup> | Large, global study. RRs consistent with other studies. Appropriate method for dichotomous variable. | Alternative PARF methods possible. Important to use independent RR values. (Aim to examine activity sub-categories in future studies) | CURRENT APPROACH | 17,445 (5%) |
| 2. Regression approach   | -                         | -                                                                                                    | Appropriate Betas do not exist, and methodologically dubious                                                                          | Not attempted    | -           |

**Table 9. Main Assumptions and Overlap Adjustments Used in the Polish IMPACT Model**

| Treatment category                                                  | <i>ASSUMPTIONS AND OVERLAP<br/>ADJUSTMENTS</i>                                                                                                                                                                                                                                                                                         | Justification                                                 |
|---------------------------------------------------------------------|----------------------------------------------------------------------------------------------------------------------------------------------------------------------------------------------------------------------------------------------------------------------------------------------------------------------------------------|---------------------------------------------------------------|
| Post-AMI patients                                                   | Assume 25% already counted as HF patients<br>Therefore assume residual case fatality halved, having transferred these HF patients to the HF group                                                                                                                                                                                      | Unal (2004) <sup>4</sup><br>Unal (2004) <sup>4</sup>          |
| Post-CABG patients                                                  | Assume 2/3 had MI, already counted as Post AMI                                                                                                                                                                                                                                                                                         | Unal (2004) <sup>4</sup>                                      |
| Post-PTCA survivors                                                 | Assume 50% had prior AMI, already counted as Post AMI<br>Assume 25% also had CABG, thus already counted as Post CABG<br>Assume 25% had prior PTCA, i.e. repeats, already counted                                                                                                                                                       | Unal (2004) <sup>4</sup><br>NHDS<br>NHDS                      |
| Chronic angina treatment: PTCA patients progressing to CABG surgery | Assume that 20% of PTCA go to CABG                                                                                                                                                                                                                                                                                                     | NHDS                                                          |
| Angina in the community                                             | Start with the total patient numbers with angina in the community, based on NHANES prevalence<br>Then deduct patients counted elsewhere:<br>-Patients already treated for unstable angina in hospital,<br>-50% of those receiving CABG for angina<br>-50% of those receiving secondary prevention post AMI/post CABG/Post Angioplasty, | Capewell (2000) <sup>3</sup>                                  |
| Heart failure in the community                                      | Based on NHANES prevalence<br>Assume 50% of heart failure is due to CHD<br>Deduct patients treated for severe heart failure in the hospital (already counted)                                                                                                                                                                          | NHANES 1999-2000                                              |
| Hypertension treatment: overlaps with other CHD patient groups      | Total hypertensive patient numbers in community calculated, then deduct:<br>-50% of post AMI patients<br>-50% of community angina patients<br>-50% of community heart failure patients                                                                                                                                                 | NHANES 1999-2000                                              |
| Fall in population blood pressure                                   | Estimate the number of DPPs by hypertension treatment<br>-Then subtract this from the total DPPs attributed to the secular fall in population BP                                                                                                                                                                                       | Capewell (1999) <sup>56</sup><br>Capewell (2000) <sup>3</sup> |

AMI denotes acute myocardial infarction, CABG coronary artery bypass graft surgery, CHD coronary heart disease, DPPs deaths prevented or postponed, HF heart failure, NHANES National Health and Nutrition Examination Survey, and PTCA percutaneous transluminal coronary angioplasty.

## 2. Result tables

Table 10. Estimated coronary heart disease deaths prevented or postponed by medical and surgical treatments in Poland in 2005

| Patient groups & specific treatments  | Patients Eligible | Treatment Uptake (%) | Relative Risk Reduction (%) | Mean Case Fatality | Absolute Risk Reduction | Deaths Prevented or Postponed |                   |                   |                           |         |         |
|---------------------------------------|-------------------|----------------------|-----------------------------|--------------------|-------------------------|-------------------------------|-------------------|-------------------|---------------------------|---------|---------|
|                                       |                   |                      |                             |                    |                         | Number*                       | Minimum Estimate* | Maximum Estimate* | % of total mortality fall | Minimum | Maximum |
| <b>Acute myocardial infarction</b>    | 52180             |                      |                             |                    |                         | <b>1340</b>                   | 370               | 2550              | <b>5.1</b>                | 1.4     | 9.7     |
| Community resuscitation               |                   | 19                   | 0.06                        | 0.063              | 0.053                   | <b>330</b>                    | 170               | 560               | <b>1.3</b>                | 0.6     | 2.1     |
| Hospital resuscitation                |                   | 4                    | 0.33                        | 0.063              | 0.33                    | <b>610</b>                    | 160               | 840               | <b>2.3</b>                | 0.6     | 3.2     |
| Thrombolysis                          |                   | 4                    | 0.27                        | 0.063              | 0.016                   | <b>30</b>                     | 20                | 60                | <b>0.1</b>                | 0.1     | 0.2     |
| Aspirin                               |                   | 81                   | 0.15                        | 0.063              | 0.01                    | <b>350</b>                    | 180               | 640               | <b>1.3</b>                | 0.7     | 2.4     |
| Beta blocker                          |                   | 64                   | 0.04                        | 0.063              | 0.003                   | <b>70</b>                     | -100              | 410               | <b>0.3</b>                | -0.4    | 1.6     |
| ACE inhibitor                         |                   | 62                   | 0.07                        | 0.063              | 0.004                   | <b>130</b>                    | 20                | 290               | <b>0.5</b>                | 0.1     | 1.1     |
| Primary angioplasty                   |                   | 39                   | 0.36                        | 0.063              | 0.021                   | <b>360</b>                    | 200               | 670               | <b>1.4</b>                | 0.8     | 2.6     |
| Primary CABG                          |                   | 1                    | 0.39                        | 0.063              | 0.025                   | <b>10</b>                     | 10                | 20                | <b>0</b>                  | 0       | 0.1     |
| minus AMI treatments in 1991          |                   |                      |                             |                    |                         | <b>-560</b>                   | -280              | -920              | <b>-2.1</b>               | -1.1    | -3.5    |
| <b>Unstable angina</b>                | 105920            |                      |                             |                    |                         | <b>1110</b>                   | 550               | 1850              | <b>4.2</b>                | 2.1     | 7.1     |
| Aspirin & heparin                     |                   | 58                   | 0.33                        | 0.054              | 0.018                   | <b>910</b>                    | 420               | 1430              | <b>3.5</b>                | 1.6     | 5.4     |
| Aspirin alone                         |                   | 26                   | 0.15                        | 0.054              | 0.008                   | <b>200</b>                    | 90                | 290               | <b>0.8</b>                | 0.3     | 1.1     |
| GP IIB/IIIA antagonists & clopidogrel |                   | 1                    | 0.09                        | 0.054              | 0.005                   | <b>0</b>                      | 0                 | 0                 | <b>0.0</b>                | 0.0     | .00     |
| CABG surgery for UA                   |                   | 1                    | 0.43                        | 0.054              | 0.02                    | <b>30</b>                     | 10                | 40                | <b>0.1</b>                | 0.0     | 0.2     |
| Angioplasty for UA                    |                   | 14                   | 0.32                        | 0.054              | 0.02                    | <b>220</b>                    | 100               | 340               | <b>0.8</b>                | 0.4     | 1.3     |
| minus UA treatments in 1991           |                   |                      |                             |                    |                         | <b>-250</b>                   | -80               | -250              | <b>-1</b>                 | -0.3    | -1      |

| Patient groups & specific treatments                   | Patients Eligible | Treatment Uptake (%) | Relative Risk Reduction (%) | Mean Case Fatality | Absolute Risk Reduction | Deaths Prevented or Postponed |                   |                   |                           |             |             |
|--------------------------------------------------------|-------------------|----------------------|-----------------------------|--------------------|-------------------------|-------------------------------|-------------------|-------------------|---------------------------|-------------|-------------|
|                                                        |                   |                      |                             |                    |                         | Number*                       | Minimum Estimate* | Maximum Estimate* | % of total mortality fall | Minimum     | Maximum     |
| <b>Secondary prevention post-myocardial infarction</b> | 213970            |                      |                             |                    |                         | <b>1300</b>                   | <i>520</i>        | <i>2650</i>       | <b>4.9</b>                | <i>2.0</i>  | <i>10.1</i> |
| Aspirin                                                |                   | 75                   | 0.15                        | 0.039              | 0.006                   | <b>430</b>                    | <i>180</i>        | <i>890</i>        | <b>1.6</b>                | <i>0.7</i>  | <i>3.4</i>  |
| Beta blocker                                           |                   | 63                   | 0.23                        | 0.039              | 0.009                   | <b>550</b>                    | <i>230</i>        | <i>1150</i>       | <b>2.1</b>                | <i>0.9</i>  | <i>4.4</i>  |
| ACE inhibitor                                          |                   | 59                   | 0.20                        | 0.039              | 0.008                   | <b>450</b>                    | <i>180</i>        | <i>930</i>        | <b>1.7</b>                | <i>0.7</i>  | <i>3.6</i>  |
| Statin                                                 |                   | 57                   | 0.22                        | 0.039              | 0.008                   | <b>360</b>                    | <i>150</i>        | <i>750</i>        | <b>1.4</b>                | <i>0.6</i>  | <i>2.9</i>  |
| Warfarin                                               |                   | 3                    | 0.22                        | 0.039              | 0.008                   | <b>40</b>                     | <i>10</i>         | <i>60</i>         | <b>0.2</b>                | <i>0.0</i>  | <i>0.2</i>  |
| minus secondary prevention post-MI in 1991             |                   |                      |                             |                    |                         | <b>-540</b>                   | <i>-220</i>       | <i>-1130</i>      | <b>-2.1</b>               | <i>-0.8</i> | <i>-4.3</i> |
| <b>Secondary prevention post-CABG/PTCA</b>             | 100890            |                      |                             |                    |                         | <b>630</b>                    | <i>260</i>        | <i>1310</i>       | <b>2.4</b>                | <i>1.0</i>  | <i>5.0</i>  |
| Aspirin                                                |                   | 84                   | 0.15                        | 0.014              | 0.002                   | <b>120</b>                    | <i>50</i>         | <i>260</i>        | <b>0.5</b>                | <i>0.2</i>  | <i>1.0</i>  |
| Beta blocker                                           |                   | 67                   | 0.23                        | 0.014              | 0.003                   | <b>150</b>                    | <i>60</i>         | <i>320</i>        | <b>0.6</b>                | <i>0.2</i>  | <i>1.2</i>  |
| ACE inhibitor                                          |                   | 65                   | 0.20                        | 0.014              | 0.003                   | <b>130</b>                    | <i>50</i>         | <i>270</i>        | <b>0.5</b>                | <i>0.2</i>  | <i>1.0</i>  |
| Statin                                                 |                   | 66                   | 0.22                        | 0.014              | 0.003                   | <b>140</b>                    | <i>60</i>         | <i>300</i>        | <b>0.5</b>                | <i>0.2</i>  | <i>1.1</i>  |
| Acenocoumarol                                          |                   | 7                    | 0.22                        | 0.014              | 0.003                   | <b>20</b>                     | <i>10</i>         | <i>30</i>         | <b>0.1</b>                | <i>0.0</i>  | <i>0.1</i>  |
| Rehabilitation                                         |                   | 24                   | 0.26                        | 0.014              | 0.004                   | <b>60</b>                     | <i>30</i>         | <i>130</i>        | <b>0.2</b>                | <i>0.1</i>  | <i>0.5</i>  |
| <b>Chronic angina</b>                                  | 706670            |                      |                             |                    |                         | <b>710</b>                    | <i>300</i>        | <i>1510</i>       | <b>2.7</b>                | <i>1.1</i>  | <i>5.8</i>  |
| CABG surgery 1991-2005                                 |                   | 100                  | 0.39                        | 0.015              | 0.003                   | <b>360</b>                    | <i>160</i>        | <i>790</i>        | <b>1.4</b>                | <i>0.6</i>  | <i>3.0</i>  |
| minus CABG surgery in 1991                             |                   |                      |                             |                    |                         | <b>-10</b>                    | <i>0</i>          | <i>-10</i>        | <b>0.0</b>                | <i>0.0</i>  | <i>0.0</i>  |
| Aspirin in the community                               |                   | 43                   | 0.15                        | 0.007              | 0.0004                  | <b>220</b>                    | <i>90</i>         | <i>460</i>        | <b>0.8</b>                | <i>0.3</i>  | <i>1.7</i>  |
| Statins in the community                               |                   | 21                   | 0.23                        | 0.007              | 0.002                   | <b>130</b>                    | <i>50</i>         | <i>270</i>        | <b>0.5</b>                | <i>0.2</i>  | <i>1.0</i>  |

Table 10 (continued)

|                                                       |          |    |      |       |        |             |             |              |             |             |             |
|-------------------------------------------------------|----------|----|------|-------|--------|-------------|-------------|--------------|-------------|-------------|-------------|
| <b>Heart failure with hospital admission</b>          | 18330    |    |      |       |        | <b>1470</b> | <i>700</i>  | <i>3550</i>  | <b>5.6</b>  | <i>2.7</i>  | <i>13.6</i> |
| ACE inhibitor                                         |          | 86 | 0.20 | 0.206 | 0.041  | <b>320</b>  | <i>130</i>  | <i>650</i>   | <b>1.2</b>  | <i>0.5</i>  | <i>2.5</i>  |
| Beta blocker                                          |          | 61 | 0.35 | 0.206 | 0.071  | <b>490</b>  | <i>300</i>  | <i>1510</i>  | <b>1.9</b>  | <i>1.1</i>  | <i>5.8</i>  |
| Spironolactone                                        |          | 64 | 0.30 | 0.206 | 0.062  | <b>350</b>  | <i>150</i>  | <i>740</i>   | <b>1.3</b>  | <i>0.6</i>  | <i>2.8</i>  |
| Aspirin                                               |          | 65 | 0.15 | 0.206 | 0.031  | <b>180</b>  | <i>70</i>   | <i>380</i>   | <b>0.7</b>  | <i>0.3</i>  | <i>1.4</i>  |
| Statins                                               |          | 41 | 0.23 | 0.206 | 0.047  | <b>130</b>  | <i>50</i>   | <i>280</i>   | <b>0.5</b>  | <i>0.2</i>  | <i>1.0</i>  |
| <hr/>                                                 |          |    |      |       |        |             |             |              |             |             |             |
| <b>Heart failure in the community</b>                 | 122680   |    |      |       |        | <b>1630</b> | <i>730</i>  | <i>3760</i>  | <b>6.2</b>  | <i>2.8</i>  | <i>14.4</i> |
| ACE inhibitor                                         |          | 49 | 0.20 | 0.061 | 0.009  | <b>220</b>  | <i>150</i>  | <i>830</i>   | <b>0.8</b>  | <i>0.6</i>  | <i>3.2</i>  |
| Beta blocker                                          |          | 46 | 0.35 | 0.061 | 0.021  | <b>630</b>  | <i>260</i>  | <i>1300</i>  | <b>2.4</b>  | <i>1.0</i>  | <i>5.0</i>  |
| Spironolactone                                        |          | 27 | 0.31 | 0.061 | 0.019  | <b>340</b>  | <i>140</i>  | <i>710</i>   | <b>1.3</b>  | <i>0.5</i>  | <i>2.7</i>  |
| Aspirin                                               |          | 37 | 0.15 | 0.061 | 0.009  | <b>230</b>  | <i>90</i>   | <i>470</i>   | <b>0.9</b>  | <i>0.4</i>  | <i>1.8</i>  |
| Statin                                                |          | 31 | 0.23 | 0.061 | 0.014  | <b>210</b>  | <i>90</i>   | <i>450</i>   | <b>0.8</b>  | <i>0.3</i>  | <i>1.7</i>  |
| <hr/>                                                 |          |    |      |       |        |             |             |              |             |             |             |
| <b>Hypertension treatments</b>                        | 8488520  | 45 | 0.13 | 0.003 | 0.0004 | <b>580</b>  | <i>-440</i> | <i>1260</i>  | <b>2.2</b>  | <i>-1.7</i> | <i>4.8</i>  |
| <hr/>                                                 |          |    |      |       |        |             |             |              |             |             |             |
| <b>Statins for primary prevention lipid reduction</b> | 14046930 | 11 | 0.35 | 0.002 | 0.0008 | <b>880</b>  | <i>360</i>  | <i>1830</i>  | <b>3.4</b>  | <i>1.4</i>  | <i>7.0</i>  |
| <hr/>                                                 |          |    |      |       |        |             |             |              |             |             |             |
| <b>Total Treatments</b>                               |          |    |      |       |        | <b>9640</b> | <i>3350</i> | <i>20270</i> | <b>36.8</b> | <i>12.8</i> | <i>77.5</i> |

\* reported numbers are rounded to nearest 10.

**Table 11. Estimated coronary deaths prevented or postponed as a result of risk factor changes in men and women in Poland 1991 - 2005.**

| Population risk factor                                                                   | Absolute level of risk factor |       | Change in risk factor |                     | Beta regression coefficient | Relative Risk | Deaths Prevented or Postponed |          |          |                            |           |           |
|------------------------------------------------------------------------------------------|-------------------------------|-------|-----------------------|---------------------|-----------------------------|---------------|-------------------------------|----------|----------|----------------------------|-----------|-----------|
|                                                                                          | 1991                          | 2005  | Absolute change       | Relative change (%) |                             |               | no. of deaths                 |          |          | percent of total reduction |           |           |
|                                                                                          |                               |       |                       |                     |                             |               | Best estimate*                | Minimum* | Maximum* | % of total fall            | Minimum % | Maximum % |
| <b>Smoking prevalence (%)</b>                                                            |                               |       |                       |                     |                             |               |                               |          |          |                            |           |           |
| Men                                                                                      | 55.8                          | 40.1  | -15.7                 | -28.0               |                             | 3.1           | <b>2980</b>                   | 2390     | 3580     | <b>15%</b>                 | 12%       | 18%       |
| Women                                                                                    | 28.1                          | 25.1  | -3.0                  | -4.0                |                             | 4.2           | <b>-10</b>                    | -10      | -10      | <b>0%</b>                  | 0%        | 0%        |
| <b>Systolic blood pressure (mmHg)</b><br>(antihypertensive treatment effects subtracted) |                               |       |                       |                     |                             |               |                               |          |          |                            |           |           |
| Men                                                                                      | 140.1                         | 137.4 | -2.7                  | -1.8                | -0.034                      |               | <b>-1720</b>                  | -1250    | -2380    | <b>-8%</b>                 | -6%       | -12%      |
| Women                                                                                    | 136.6                         | 131.5 | -5.2                  | -3.4                | -0.042                      |               | <b>1690</b>                   | 1100     | 2360     | <b>29%</b>                 | 19%       | 40%       |
| <b>Total cholesterol (mmol/l)</b><br>(statin effects subtracted)                         |                               |       |                       |                     |                             |               |                               |          |          |                            |           |           |
| Men                                                                                      | 5.6                           | 5.2   | -0.4                  | -8.6                | -0.95                       |               | <b>8390</b>                   | 6010     | 10340    | <b>41%</b>                 | 29%       | 51%       |
| Women                                                                                    | 5.6                           | 5.2   | -0.4                  | -7.6                | -0.91                       |               | <b>1920</b>                   | 1440     | 2200     | <b>33%</b>                 | 25%       | 38%       |
| <b>Physical inactivity (%)</b>                                                           |                               |       |                       |                     |                             |               |                               |          |          |                            |           |           |
| Men                                                                                      | 64.6                          | 38.7  | -25.9                 | -40.1               |                             | 1.29          | <b>2000</b>                   | 1600     | 2400     | <b>10%</b>                 | 8%        | 12%       |
| Women                                                                                    | 68.8                          | 44.5  | -24.3                 | -35.3               |                             | 1.35          | <b>630</b>                    | 510      | 760      | <b>11%</b>                 | 9%        | 13%       |
| <b>Body mass index (kg/m<sup>2</sup>)</b>                                                |                               |       |                       |                     |                             |               |                               |          |          |                            |           |           |
| Men                                                                                      | 26.0                          | 26.9  | 0.9                   | 3.2                 | 0.030                       |               | <b>-870</b>                   | -480     | -1340    | <b>-4%</b>                 | -2%       | -7%       |
| Women                                                                                    | 25.7                          | 26.6  | 0.9                   | 3.2                 | 0.027                       |               | <b>-290</b>                   | -160     | -450     | <b>-5%</b>                 | -3%       | -8%       |
| <b>Diabetes prevalence (%)</b>                                                           |                               |       |                       |                     |                             |               |                               |          |          |                            |           |           |
| Men                                                                                      | 2.9                           | 3.3   | 0.4                   | 12.7                |                             | 2.47          | <b>-190</b>                   | -130     | -250     | <b>-1%</b>                 | -1%       | -1%       |
| Women                                                                                    | 3.3                           | 4.2   | 0.9                   | 28.5                |                             | 3.40          | <b>-460</b>                   | -310     | -630     | <b>-8%</b>                 | -5%       | -11%      |
| <b>Total risk factors</b>                                                                |                               |       |                       |                     |                             |               |                               |          |          |                            |           |           |
| Men                                                                                      |                               |       |                       |                     |                             |               | <b>10 600</b>                 | 8130     | 12340    | <b>52%</b>                 | 40%       | 61%       |
| Women                                                                                    |                               |       |                       |                     |                             |               | <b>3 480</b>                  | 2570     | 4230     | <b>60%</b>                 | 44%       | 73%       |

\* reported numbers are rounded to the nearest 10.

## References:

1. Palmieri L, Bennett K, Giampaoli S, Capewell S. Explaining the decrease in coronary heart disease mortality in Italy between 1980 and 2000. *Am J Public Health*;100(4):684-92.
2. Wijeyesundera HC, Machado M, Farahati F, Wang X, Witteman W, van der Velde G, et al. Association of temporal trends in risk factors and treatment uptake with coronary heart disease mortality, 1994-2005. *JAMA*;303(18):1841-7.
3. Capewell S, Beaglehole R, Seddon M, McMurray J. Explanation for the decline in coronary heart disease mortality rates in Auckland, New Zealand, between 1982 and 1993. *Circulation* 2000;102(13):1511-6.
4. Unal B, Critchley JA, Capewell S. Explaining the decline in coronary heart disease mortality in England and Wales between 1981 and 2000. *Circulation* 2004;109(9):1101-7.
5. Ford ES, Ajani UA, Croft JB, Critchley JA, Labarthe DR, Kottke TE, et al. Explaining the decrease in U.S. deaths from coronary disease, 1980-2000. *N Engl J Med* 2007;356(23):2388-98.
6. Bjorck L, Rosengren A, Bennett K, Lappas G, Capewell S. Modelling the decreasing coronary heart disease mortality in Sweden between 1986 and 2002. *Eur Heart J* 2009;30(9):1046-56.
7. Critchley J, Liu J, Zhao D, Wei W, Capewell S. Explaining the increase in coronary heart disease mortality in Beijing between 1984 and 1999. *Circulation* 2004;110(10):1236-44.
8. Jasinski B, Bandosz P, Wojtyniak B, Zdrojewski T, Rutkowski M, Koziarek J, et al. Mortality from ischaemic heart disease in Poland in 1991-1996 estimated by the coding system used since 1997. *Kardiol Pol*;68(5):520-7.
9. Nichol MB, Venturini F, Sung JC. A critical evaluation of the methodology of the literature on medication compliance. *Ann Pharmacother* 1999;33(5):531-40.
10. Butler J, Arbogast PG, BeLue R, Daugherty J, Jain MK, Ray WA, et al. Outpatient adherence to beta-blocker therapy after acute myocardial infarction. *J Am Coll Cardiol* 2002;40(9):1589-95.
11. Polonski L, Gasior M, Gierlotka M, Kalarus Z, Cieslinski A, Dubiel JS, et al. Polish Registry of Acute Coronary Syndromes (PL-ACS). Characteristics, treatments and outcomes of patients with acute coronary syndromes in Poland. *Kardiol Pol* 2007;65(8):861-72; discussion 873-4.
12. Lewington S, Clarke R, Qizilbash N, Peto R, Collins R. Age-specific relevance of usual blood pressure to vascular mortality: a meta-analysis of individual data for one million adults in 61 prospective studies. *Lancet* 2002;360(9349):1903-13.
13. Yusuf S, Hawken S, Ounpuu S, Dans T, Avezum A, Lanus F, et al. Effect of potentially modifiable risk factors associated with myocardial infarction in 52 countries (the INTERHEART study): case-control study. *Lancet*. 2004;364(9438):937.
14. Mant J, Hicks N. Detecting differences in quality of care: the sensitivity of measures of process and outcome in treating acute myocardial infarction. *BMJ* 1995;311(7008):793-6.
15. Yusuf S. Two decades of progress in preventing vascular disease. *Lancet* 2002;360(9326):2-3.
16. Wald NJ, Law MR. A strategy to reduce cardiovascular disease by more than 80%. *BMJ* 2003;326(7404):1419.

17. Capewell S, Beaglehole R, Seddon M, McMurray J. Explaining the decline in Coronary Heart Disease Mortality in Auckland, New Zealand between 1982 and 1993. *Circulation* 2000;102:1511.
18. Fox KF, Cowie MR, Wood DA, Coats AJ, Gibbs JS, Underwood SR, et al. Coronary artery disease as the cause of incident heart failure in the population. *Eur Heart J* 2001;22(3):228-36.
19. Erens B, Primatesta P. *Health Survey for England. Cardiovascular Disease '98*. London: Stationery Office, 1999.
20. Briggs A, Sculpher M, Buxton M. Uncertainty in the economic evaluation of health care technologies: the role of sensitivity analysis. *Health Econ* 1994;3(2):95-104.
21. Antithrombotic Trialists C. Collaborative meta-analysis of randomised trials of antiplatelet therapy for prevention of death, myocardial infarction, and stroke in high risk patients. *BMJ* 2002;324(7329):71.
22. Rudner R, Jalowicki P, Karpel E, Dziurdzik P, Alberski B, Kawecki P. Survival after out-of-hospital cardiac arrests in Katowice (Poland): outcome report according to the "Utstein style". *Resuscitation* 2004;61(3):315-25.
23. Estess JM, Topol EJ. Fibrinolytic treatment for elderly patients with acute myocardial infarction. *Heart* 2002;87(4):308-11.
24. Cucherat M, Bonnefoy E, Tremeau G. Primary angioplasty versus intravenous thrombolysis for acute myocardial infarction. *Cochrane Database Syst Rev* 2000(2):CD001560.
25. Fox KA, Poole-Wilson P, Clayton TC, Henderson RA, Shaw TR, Wheatley DJ, et al. 5-year outcome of an interventional strategy in non-ST-elevation acute coronary syndrome: the British Heart Foundation RITA 3 randomised trial. *Lancet*. 2005;366(9489):914.
26. Yusuf S, Zucker D, Peduzzi P, Fisher LD, Takaro T, Kennedy JW, et al. Effect of coronary artery bypass graft surgery on survival: overview of 10-year results from randomised trials by the Coronary Artery Bypass Graft Surgery Trialists Collaboration. *Lancet* 1994;344(8922):563.
27. Freemantle N, Cleland J, Young P, Mason J, Harrison J. beta Blockade after myocardial infarction: systematic review and meta regression analysis. *BMJ* 1999;318(7200):1730.
28. Indications for ACE inhibitors in the early treatment of acute myocardial infarction: systematic overview of individual data from 100,000 patients in randomized trials. ACE Inhibitor Myocardial Infarction Collaborative Group. *Circulation* 1998;97(22):2202-12.
29. Nichol G, Stiell IG, Hebert P, Wells GA, Vandemheen K, Laupacis A. What is the quality of life for survivors of cardiac arrest? A prospective study. *Acad. Emerg. Med.* 1999;6(2):95.
30. Rea TD, Eisenberg MS, Culley LL, Becker L. Dispatcher-assisted cardiopulmonary resuscitation and survival in cardiac arrest. *Circulation*. 2001;104(21):2513.
31. Nadkarni VM, Larkin GL, Peberdy MA, Carey SM, Kaye W, Mancini ME, et al. First documented rhythm and clinical outcome from in-hospital cardiac arrest among children and adults. *JAMA* 2006;295(1):50-7.
32. Tunstall-Pedoe H, Bailey L, Chamberlain DA, Marsden AK, Ward ME, Zideman DA. Survey of 3765 cardiopulmonary resuscitations in British hospitals (the BRESUS Study): methods and overall results. *BMJ* 1992;304(6838):1347-51.
33. Flather MD, Yusuf S, Kober L, Pfeffer M, Hall A, Murray G, et al. Long-term ACE-inhibitor therapy in patients with heart failure or left-ventricular dysfunction: a systematic overview of data from individual patients. ACE-Inhibitor Myocardial Infarction Collaborative Group. *Lancet* 2000;355(9215):1575.



34. Baigent C, Keech A, Kearney PM, Blackwell L, Buck G, Pollicino C, et al. Efficacy and safety of cholesterol-lowering treatment: prospective meta-analysis of data from 90,056 participants in 14 randomised trials of statins. *Lancet*. 2005;366(9493):1267.
35. Wilt TJ, Bloomfield HE, MacDonald R, Nelson D, Rutks I, Ho M, et al. Effectiveness of statin therapy in adults with coronary heart disease. *Arch Intern Med* 2004;164(13):1427-36.
36. Anand SS, Yusuf S. Oral anticoagulant therapy in patients with coronary artery disease: a meta-analysis. *JAMA* 1999;282(21):2058-67.
37. Lau J, Antman EM, Jimenez-Silva J, Kupelnick B, Mosteller F, Chalmers TC. Cumulative meta-analysis of therapeutic trials for myocardial infarction. *N Engl J Med* 1992;327(4):248-54.
38. Oler A, Whooley MA, Oler J, Grady D. Adding heparin to aspirin reduces the incidence of myocardial infarction and death in patients with unstable angina. A meta-analysis. *JAMA* 1996;276(10):811-5.
39. Boersma E, Harrington RA, Moliterno DJ, White H, Theroux P, Van de Werf F, et al. Platelet glycoprotein IIb/IIIa inhibitors in acute coronary syndromes: a meta-analysis of all major randomised clinical trials. *Lancet* 2002;359(9302):189-98.
40. Shibata MC, Flather MD, Wang D. Systematic review of the impact of beta blockers on mortality and hospital admissions in heart failure. *Eur.J.Heart Fail.* 2001;3(3):351.
41. Pitt B, Zannad F, Remme WJ, Cody R, Castaigne A, Perez A, et al. The effect of spironolactone on morbidity and mortality in patients with severe heart failure. Randomized Aldactone Evaluation Study Investigators. *N.Engl.J.Med.* 1999;341(10):709.
42. Law M, Wald N, Morris J. Lowering blood pressure to prevent myocardial infarction and stroke: a new preventive strategy. *Health Technol.Assess.* 2003;7(31):1.
43. Pignone M, Phillips C, Mulrow C. Use of lipid lowering drugs for primary prevention of coronary heart disease: meta-analysis of randomised trials. *BMJ* 2000;321(7267):983-6.
44. Tunstall-Pedoe H, Vanuzzo D, Hobbs M, Mahonen M, Cepaitis Z, Kuulasmaa K, et al. Estimation of contribution of changes in coronary care to improving survival, event rates, and coronary heart disease mortality across the WHO MONICA Project populations. *Lancet* 2000;355(9205):688-700.
45. Bunch TJ, White RD, Gersh BJ, Meverden RA, Hodge DO, Ballman KV, et al. Long-term outcomes of out-of-hospital cardiac arrest after successful early defibrillation. *N Engl J Med* 2003;348(26):2626-33.
46. van Domburg RT, Miltenburg-van-Zijl AJ, Veerhoek RJ, Simoons ML. Unstable angina: good long-term outcome after a complicated early course. *J Am Coll Cardiol* 1998;31(7):1534.
47. Law MR, Wald NJ, Thompson SG. By how much and how quickly does reduction in serum cholesterol concentration lower risk of ischaemic heart disease? *BMJ* 1994;308(6925):367-72.
48. Bogers RP, Hoogenveen RT, Boshuizen H, Woodward M, Knekt P, Van Dam RM, et al. Overweight and obesity increase the risk of coronary heart disease: a pooled analysis of 30 prospective studies. *European Journal of Epidemiology* 2006;21 (supplement):107.
49. James W, Jackson-Leach R, Mhurchu C. Overweight and obesity (high body mass index). In: Ezzati M, Lopez A, Rodgers A, Murray C, editors. *Comparative quantification of risk. Global and regional burden of disease attributable to selected major risk factors*. Geneva: World Health Organization, 2004:497-596.
50. Marmot M, Elliot P. *Coronary heart disease epidemiology - from aetiology to public health*. 2nd ed. New York: Oxford University Press, 2004.

51. Law MR, Wald NJ, Wu T, Hackshaw A, Bailey A. Systematic underestimation of association between serum cholesterol concentration and ischaemic heart disease in observational studies: data from the BUPA study. *BMJ* 1994;308(6925):363-6.
52. Vartiainen E, Puska P, Pekkanen J, Tuomilehto J, Jousilahti P. Changes in risk factors explain changes in mortality from ischaemic heart disease in Finland. *BMJ* 1994;309(6946):23.
53. Yusuf S, Hawken S, Ounpuu S, Bautista L, Franzosi MG, Commerford P, et al. Obesity and the risk of myocardial infarction in 27,000 participants from 52 countries: a case-control study. *Lancet* 2005;366(9497):1640-9.
54. Sculpher MJ, Seed P, Henderson RA, Buxton MJ, Pocock SJ, Parker J, et al. Health service costs of coronary angioplasty and coronary artery bypass surgery: the Randomised Intervention Treatment of Angina (RITA) trial. *Lancet* 1994;344(8927):927-30.
55. Folland ED, Hartigan PM, Parisi AF. Percutaneous transluminal coronary angioplasty versus medical therapy for stable angina pectoris: outcomes for patients with double-vessel versus single-vessel coronary artery disease in a Veterans Affairs Cooperative randomized trial. Veterans Affairs ACME Investigators. *J.Am.Coll.Cardiol.* 1997;29(7):1505.
56. Capewell S, Morrison CE, McMurray JJ. Contribution of modern cardiovascular treatment and risk factor changes to the decline in coronary heart disease mortality in Scotland between 1975 and 1994. *Heart* 1999;81(4):380.
